# Supplementary material for: All-soft, battery-free, and wireless chemical sensing platform based on liquid metal for liquid- and gas-phase VOC detection
Source: Royal Society of Chemistry journal article supplement (doi:10.1039/c7lc00390k), 2017-01-01
Supplement: c7lc00390k1.pdf [file c7lc00390k1.pdf]

## Supporting Information

### All-soft, battery-free, and wireless chemical sensing platform based on liquid metal for liquid- and gas-phase VOC detection

Min-gu Kim<sup>ab</sup>, Hommood Alrowais<sup>ab</sup>, Choongsoon Kim<sup>ab</sup>, Pyungwoo Yeon<sup>a</sup>, Maysam Ghovanloo<sup>a</sup>, and Oliver Brand<sup>\*ab</sup>

<sup>a</sup>School of Electrical and Computer Engineering, Georgia Institute of Technology, Atlanta, GA 30332, USA

<sup>b</sup>Institute for Electronics and Nanotechnology, Georgia Institute of Technology, Atlanta, GA 30332, USA

E-mail: [oliver.brand@ece.gatech.edu](mailto:oliver.brand@ece.gatech.edu)

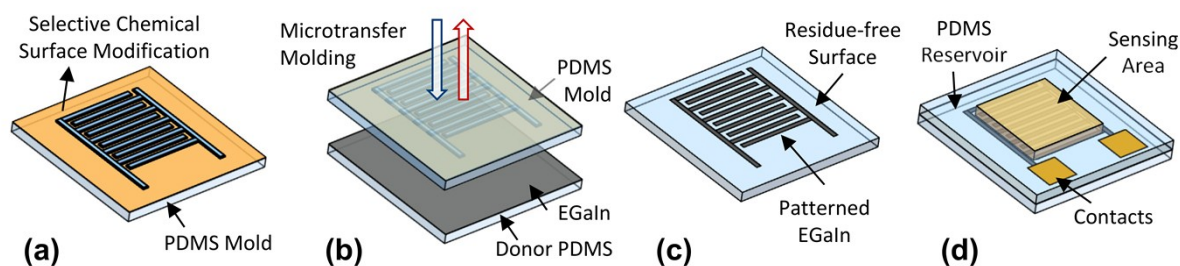

**Fig. S1** An advanced EGaln patterning process for scalable, uniform, and residue-free EGaln thin-line fabrication: (a) selective chemical surface modification of the PDMS mold, (b) microtransfer molding of EGaln, (c) EGaln-filled PDMS mold after residue transfer, and (d) microfluidic integration and vertical interconnection.<sup>29,30</sup>

**Advanced EGaln thin-line patterning process<sup>29,30</sup>:** The surface of the PDMS mold for the interdigitated capacitor is selectively chemically modified using toluene for selective wetting. Then, the PDMS mold is pressed onto a donor substrate coated with the liquid metal film and separated from it. Liquid metal residue on the outside of the channels can now be effectively transferred to a sacrificial PDMS layer. Finally, the patterned capacitor is covered with a PDMS microfluidic reservoir for liquid-phase and gas-phase VOC detection.

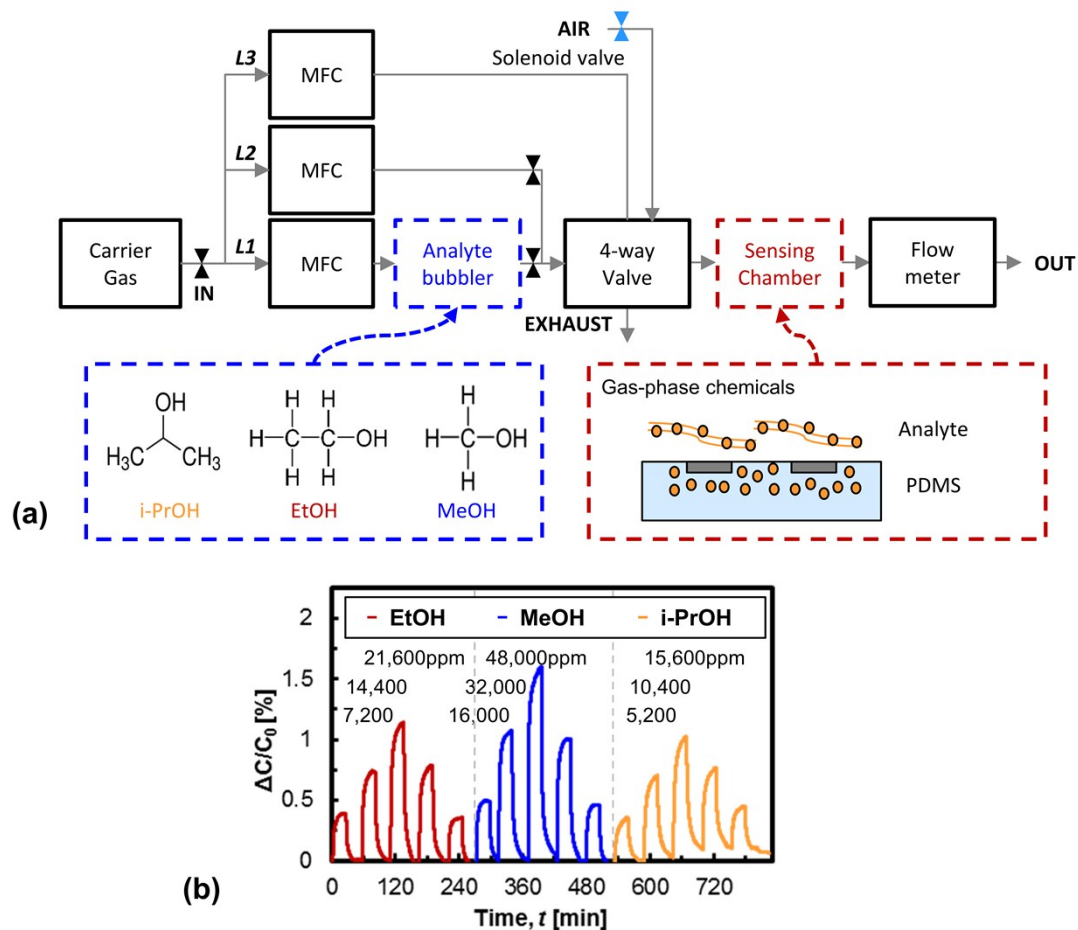

**Fig. S2** (a) Schematic of gas testing setup with mass-flow-controlled (MFC) analyte ( $L1$ ), diluting ( $L2$ ), and reference ( $L3$ ) lines to generate different analyte concentrations and rapidly switch between analyte and reference gas streams using a 4-way valve; (b) Measured relative capacitance changes while subsequently exposing the sensor to different analyte concentrations of ethanol (EtOH), methanol (MeOH), and isopropanol (i-PrOH) with reference gas purging steps inbetween each analyte exposure.

**Measurement.** A custom-made gas mixing system is used for VOC gas sensing at different analyte concentrations. The incoming carrier gas is split into three gas streams ( $L1 - L3$ ). A gas stream loaded with the desired VOC at its (temperature-dependent) saturated vapor pressure is generated by feeding carrier gas through a temperature-controlled bubbler containing analyte-soaked quartz sand ( $L1$ ). The VOC gas stream is diluted by a secondary carrier gas stream ( $L2$ ) before flowing across the sensor mounted in the measurement chamber. After each analyte exposure, the reference stream ( $L3$ ) flushes the sensing chamber with a reference gas. Rapid switching between analyte and reference gas streams is achieved using a 4-way valve. Each gas stream is individually controlled and monitored by a mass flow controller (MFC). The measurements were carried out at room temperature and near zero RH.

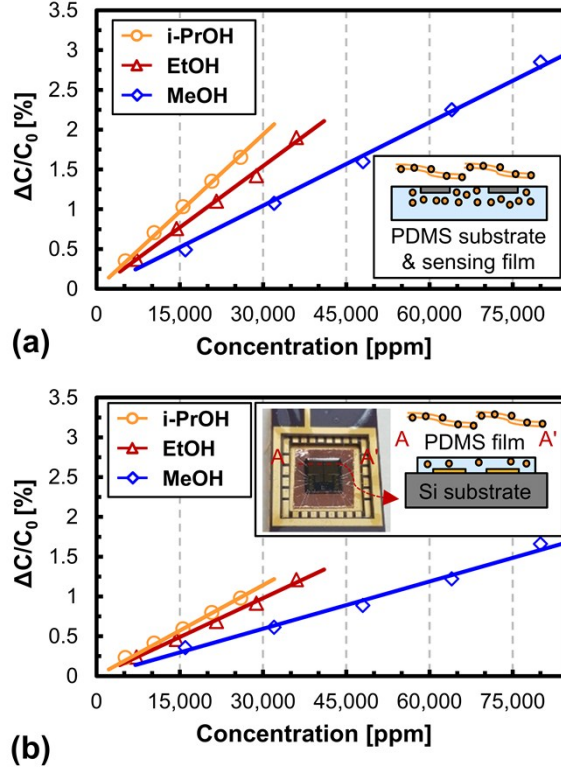

**Fig. S3** Measured relative capacitance changes of (a) all-soft sensor and (b) solid-state sensor with a PDMS sensing film as a function of the analyte concentrations of isopropanol (i-PrOH), ethanol (EtOH), and methanol (MeOH).

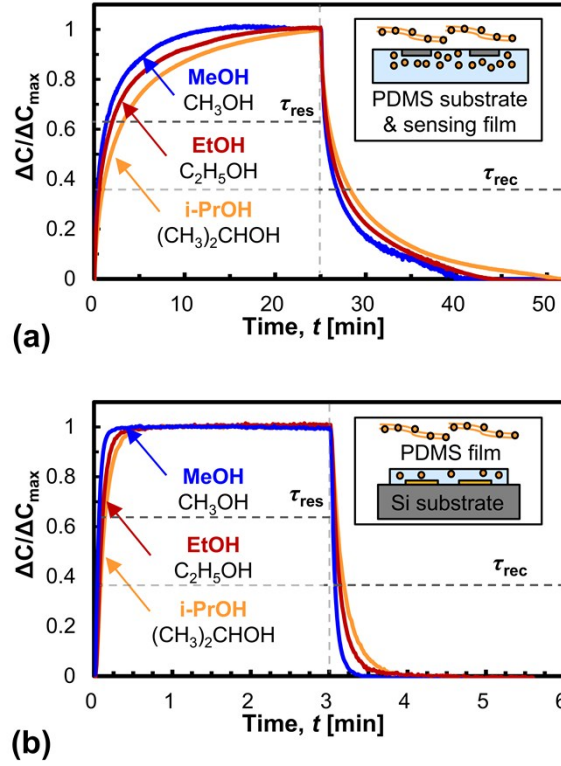

**Fig. S4** Transient signal responses, i.e. normalized capacitance changes, during analyte absorption and subsequent analyte desorption for (a) all-soft sensor (b) solid-state sensor with a PDMS sensing film upon exposure to isopropanol (i-PrOH), ethanol (EtOH), and methanol (MeOH).
